# Supplementary material for: Optimizing PVD conditions for electrochemical anodization growth of well-adherent Ta2O5nanotubes on Ti–6Al–4V alloy
Source: Royal Society of Chemistry journal article supplement (doi:10.1039/c6ra11290k), 2016-01-01
Supplement: c6ra11290k1.pdf [file c6ra11290k1.pdf]

## Supplementary content

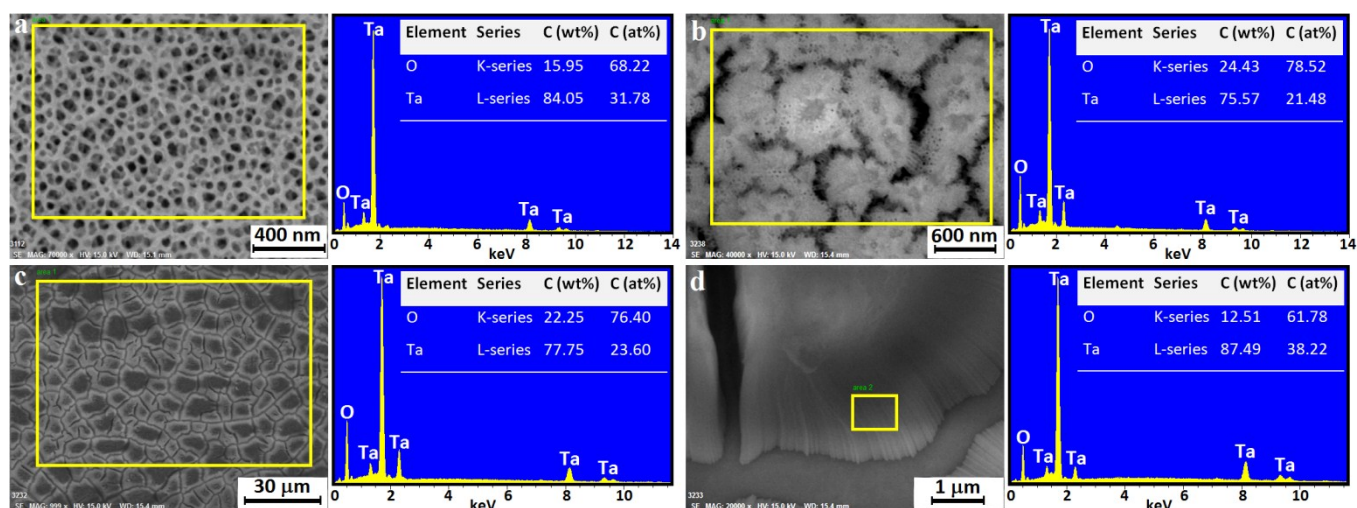

**Fig. S1** EDS spectra of the coatings on Ti64 after the two-step anodization process with different durations in  $\text{H}_2\text{SO}_4$  : HF (99:1) + 5% EG electrolyte at a constant potential of 15 V; (a) 1, (b) 10, (c) 20 min, and (d) EDS cross sectional analysis.

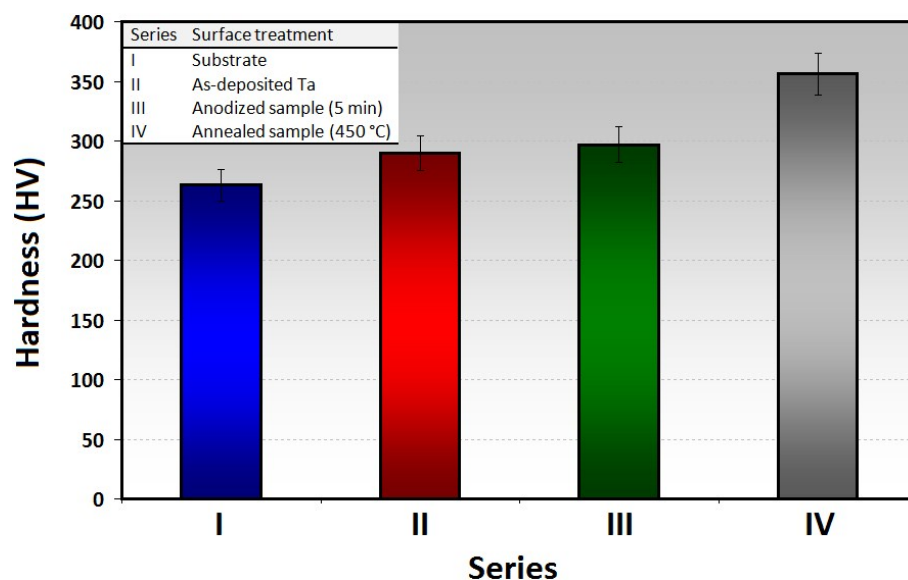

**Fig. S2** The disparity in the Vickers hardness test of the substrate, as-deposited Ta layer and 5 min anodized sample before and after annealing at 450 °C for 1 h.
